# Supplementary material
Source: Springer Nature journal article supplement (https://www.springermedizin.de/resource/supplementary/12885_2010_2316_MOESM6_ESM.pdf/9461004)

### A *CD44* mRNA expression

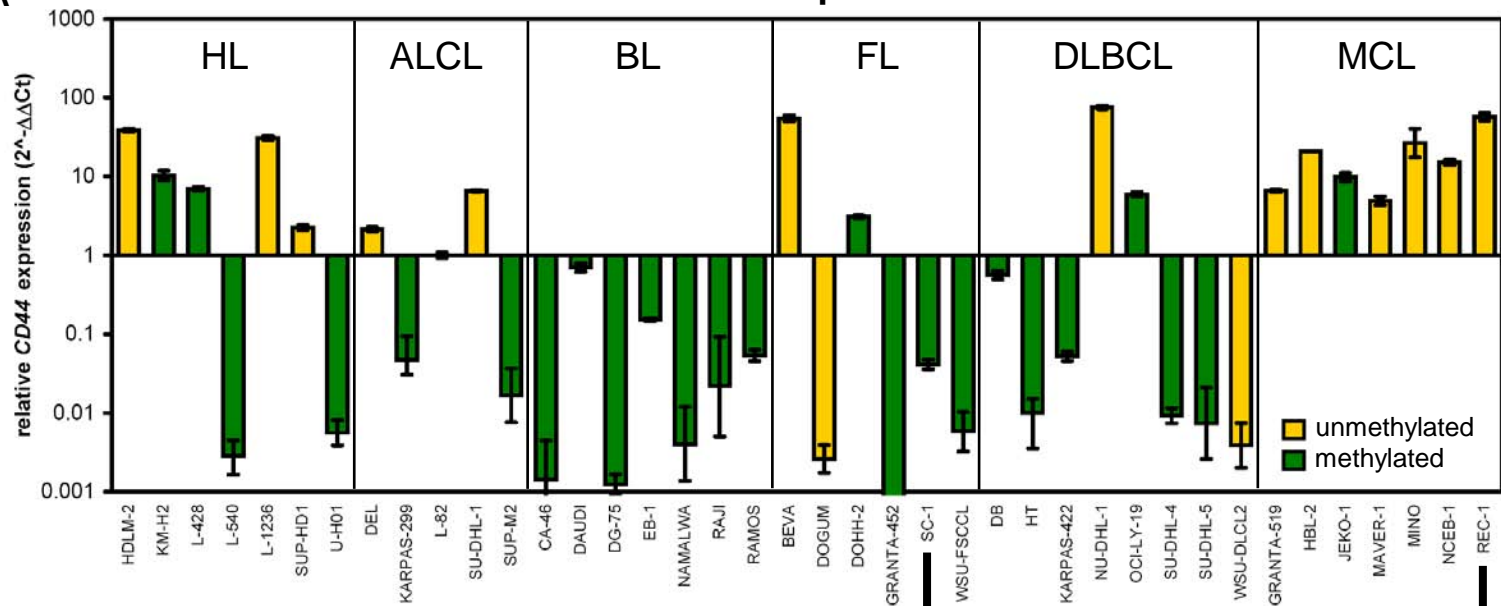

### B *CD44* protein expression

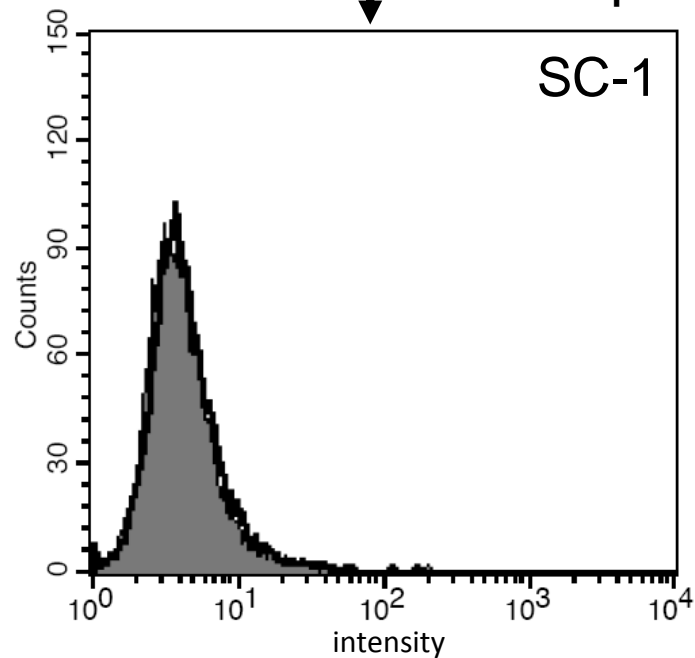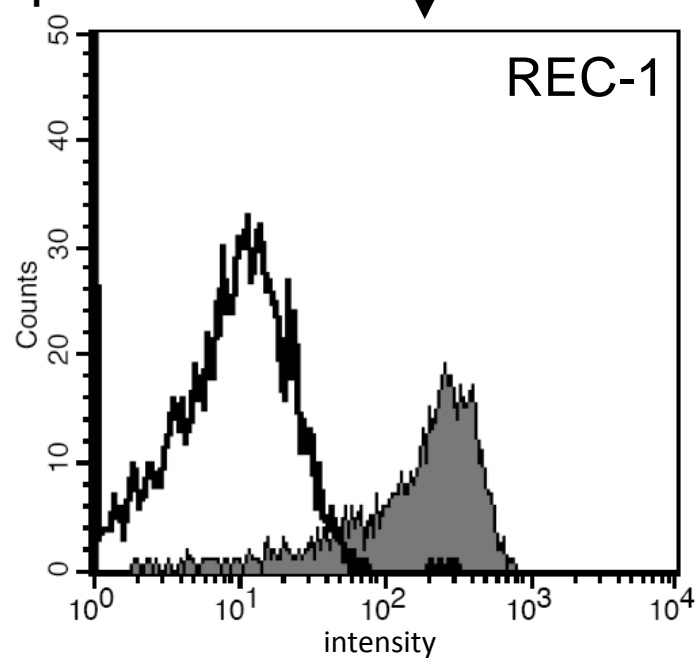

Supplement: MOESM6 [file 9461004]
